# Supplementary material for: RSPO3 impairs barrier function of human vascular endothelial monolayers and synergizes with pro-inflammatory IL-1
Source: PubMed Central journal article supplement (PMC6116367; doi:10.1186/s10020-018-0048-z), 2018-08-29
Supplement: 10020_2018_48_MOESM1_ESM.pdf [file 10020_2018_48_MOESM1_ESM.pdf]

**1 Additional file 1****2 Supplementary methods****3 Cell culture**

4 HCAEC (Cat. No. CC-2585), HPAEC (Cat. No. CC-2530), HCMVEC (Cat. No. CC-7030),  
5 HDMVEC (CC-2543, all from Clonetics, Lonza), and HBMVEC (Cat. No. ACBRI 376, Cell  
6 Systems) were propagated in EBM-2 medium (Clonetics, Lonza) supplemented with EGM-  
7 2MV Single Quots with 5% FBS (Clonetics, Lonza) in a Class 100 HEPA air filtered system  
8 (SteriCult, Fisher Scientific, Switzerland) as described [1]. All the five endothelial cell types  
9 used in this study were tested positively and functionally for CD31/105, von Willebrand  
10 Factor VIII, and acetylated low density lipoprotein uptake as guaranteed by the manufacturer  
11 (Lonza, Cell Systems). To avoid masked low-level contamination in cultures, culture  
12 medium devoid of antibiotics was used throughout the study. Only cells from passages 3- 6  
13 were used for the experiments. Endothelial monolayers were treated with recombinant human  
14 RSPO3 (500 ng/mL, Cat. No. 120-44, PeproTech) and recombinant human IL-1 $\beta$  (20 U/mL,  
15 Cat. No. 200-01B, PeproTech). A dose response assessment performed with three different  
16 concentrations of RSPO3 (250 ng/mL, 500 ng/mL and 1000 ng/mL) revealed 500 ng/mL as  
17 the optimal dose required to produce significant reproducible changes in monolayer  
18 permeability (Additional file 3: Fig. S2). Therefore, 500 ng/mL of RSPO3 was chosen in all  
19 further experiments in this study. For all pipetting steps, TipOne aerosol barrier sterile filter  
20 pipet tips (USA Scientific) were used.

**21 Immunoblotting**

22 Immunoblotting of RSPO3 and quantification of band densities were carried out as  
23 described [2] with modifications. After resolving equal amounts of protein on Criterion  
24 Stain-Free Precast Gels (Cat. 567–8074, Bio-Rad) and transferring onto PVDF membranes,  
25 the membranes were incubated with blocking solution (5% BSA in 1X TBS containing 0.1%

1 Tween-20) for 1 h at room temperature (RT). The membranes were then washed thrice in 1X  
2 TBS containing 0.1% Tween-20 (TBST) and incubated with primary antibodies (diluted in  
3 blocking solution) at 4°C overnight. The following antibody was used with dilution indicated:  
4 rabbit anti-RSPO3, polyclonal (1:500, Cat. No. ab171010, Abcam). After washing thrice in  
5 1X TBST, blots were incubated with anti-rabbit IgG- HRP-linked whole antibody (1:5000,  
6 Cat. No. NA934V, GE Healthcare UK Limited) for 1 h at RT. The blots were washed thrice  
7 in 1X TBST and visualized with ECL Plus Western blotting detection reagents (Amersham  
8 Bioscience) in a ChemiDoc MP imaging system (Bio-Rad). Densitometry analysis of blots  
9 were performed using Bio-Rad Image lab 5.2.1 software. In-gel stained total protein served as  
10 loading control for RSPO3 protein quantification.

### 11 **Live recording of endothelial monolayer barrier function using ECIS**

12 The response of the endothelial monolayer barrier to a particular stimulus is functionally  
13 assessed in real-time in a fully standardized manner by continuously recording changes in  
14 trans-endothelial electrical resistance (TEER) using ECIS [3]. Endothelial barrier function  
15 was continuously recorded using the 8W10E+ electrode chamber arrays and ECIS Z Theta  
16 system (Applied Biophysics) with associated software v.1.2.126 PC, as described [1].  
17 Briefly, 8W10E+ arrays were coated with rat tail collagen type I (0.01% in sterile pyrogen-  
18 free water; BD Biosciences) for 12 h and the array electrodes were stabilized as per  
19 manufacturer's instructions. A monodisperse suspension of human vascular endothelial cells  
20 in EGM-2 MV medium (Clonetics, Lonza) supplemented with 5% FBS was added to the  
21 arrays at a density of 80,000–90,000 cells/well and incubated up to 20- 24 h to form a  
22 uniform dense monolayer (Additional file 2: Fig. S1). Treatments were carried out adding  
23 200 µL fresh medium with the respective stimuli into wells containing 200 µL of culture  
24 medium, yielding the final concentrations indicated in a total volume of 400 µL/well.  
25 Resistance of endothelial monolayer was continuously measured in Ohms at multiple

1 frequencies ranging from 62.6 Hz to 64 kHz. Each of the eight wells of the 8W10E+ arrays  
2 contain 40 electrodes that trace the monolayer at 40 different locations in every well. The  
3 measurements from each well were averaged. Resistance measurements at 4000 Hz indicative  
4 of cell-cell adhesion tightness are shown.

### 5 **Immunofluorescence staining**

6 Cells were grown up to a confluent monolayer stage in rat tail collagen type I coated four-  
7 chamber glass culture slides (Falcon), incubated with the indicated stimuli for 6 h and fixed  
8 immediately with 4% formalin buffer for 10 min. Cells were washed thrice in PBS, incubated  
9 with blocking solution (10% goat serum and 1% BSA in PBS) for 1 h at RT and  
10 immunofluorescence staining for  $\beta$ -catenin and VE-cadherin were performed as described [1,  
11 4]. Rabbit -anti-  $\beta$ -catenin (diluted 1:150, Cat. No. 9562, Cell Signalling Technology) and  
12 rabbit-anti-VE-cadherin (diluted 1:100, Cat. No. 2158, Cell Signalling Technology) were  
13 used as the primary antibodies and detected by the Alexa 568 labelled goat anti-rabbit  
14 secondary antibody (1:2000, Cat. No. A11036, Molecular Probes, Invitrogen). The antibodies  
15 were diluted in PBS containing 1% goat serum and 0.1% BSA. To stain for cellular actin,  
16 formalin fixed cells were incubated with Alexa Fluor 488 Phalloidin (diluted 1:80, Molecular  
17 Probes, Invitrogen, USA) for 1 h at RT in the dark. Quantitative assessment of gap index and  
18 gap size index were carried out as described [5]. Gaps were quantified from 8 fields ( $\geq 75\%$   
19 cells/field) of VE-cadherin immunostained endothelial monolayers from each of the two  
20 experimental groups (nontreated, RSPO3 treated). Total cell area and inter-endothelial gap  
21 area were quantified using ImageJ based Fiji software.

22

23

24

25

## 1 **References**

- 2 1. Skaria T, Bachli E, Schoedon G. Wnt5A/Ryk signaling critically affects barrier  
3 function in human vascular endothelial cells. *Cell Adhesion & Migration*. 2017;  
4 **11**:24-38.
- 5 2. Skaria T, Bachli E, Schoedon G. WIF1 prevents Wnt5A mediated LIMK/CFL  
6 phosphorylation and adherens junction disruption in human vascular endothelial cells.  
7 *J Inflamm (Lond)*. 2017; **14**:10.
- 8 3. Bernas MJ, Cardoso FL, Daley SK, Weinand ME, Campos AR, Ferreira AJG, Hoying  
9 JB, Witte MH, Brites D, Persidsky Y, et al. Establishment of primary cultures of  
10 human brain microvascular endothelial cells to provide an in vitro cellular model of  
11 the blood-brain barrier. *Nat Protocols*. 2010; **5**:1265-1272.
- 12 4. Skaria T, Burgener J, Bachli E, Schoedon G. IL-4 Causes Hyperpermeability of  
13 Vascular Endothelial Cells through Wnt5A Signaling. *PLOS ONE*. 2016;  
14 **11**:e0156002.
- 15 5. Fraccaroli A, Pitter B, Taha AA, Seebach J, Huveneers S, Kirsch J, Casaroli-Marano  
16 RP, Zahler S, Pohl U, Gerhardt H, et al. Endothelial alpha-parvin controls integrity of  
17 developing vasculature and is required for maintenance of cell-cell junctions. *Circ*  
18 *Res*. 2015; **117**:29-40.

19

20

21

22

23

24
