# Supplementary material for: RSPO3 impairs barrier function of human vascular endothelial monolayers and synergizes with pro-inflammatory IL-1
Source: PubMed Central journal article supplement (PMC6116367; doi:10.1186/s10020-018-0048-z), 2018-08-29

**A**

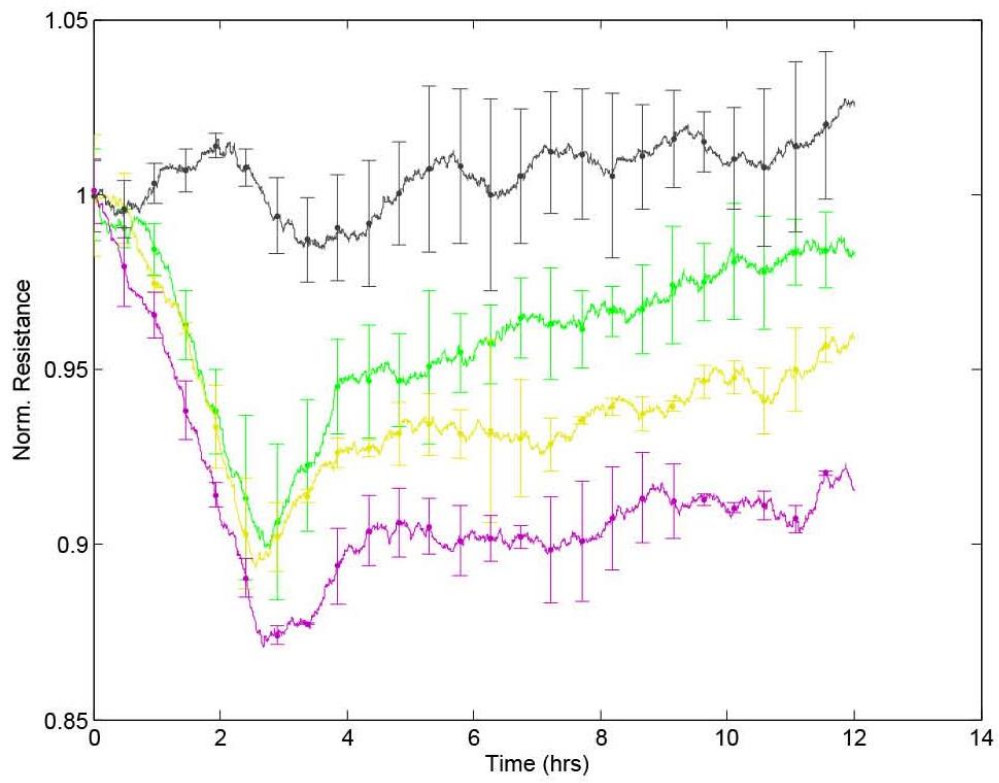

**B**

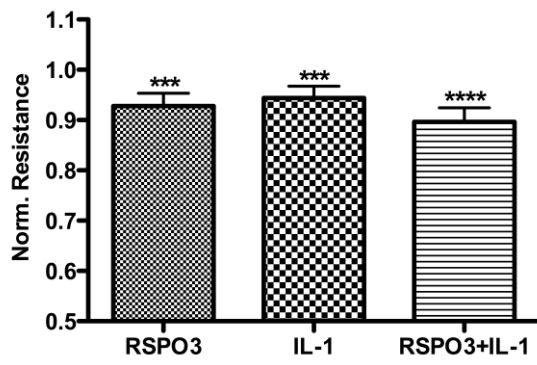

Supplement: 10020_2018_48_MOESM4_ESM.pdf [file 10020_2018_48_MOESM4_ESM.pdf]
